# Supplementary material
Source: PubMed Central journal article supplement (PMC3484504)
Supplement: mmc1.pdf [file mmc1.pdf]

## Supplemental Data

### An Excess of Deleterious Variants in VEGF-A Pathway Genes in Down Syndrome-Associated Atrioventricular Septal Defects

Christine Ackerman, Adam E. Locke, Eleanor Feingold, Benjamin Reshey, Karina Espana, Janita Thusberg, Sean Mooney, Lora J. H. Bean, Kenneth J. Dooley, Clifford L. Cua, Roger H. Reeves, Stephanie L. Sherman, and Cheryl L. Maslen

**Table S1. Candidate-Gene List**

| Gene                | Rationale for Inclusion                                                                           | Function in Heart Development                                                                                                                                                                                           |
|---------------------|---------------------------------------------------------------------------------------------------|-------------------------------------------------------------------------------------------------------------------------------------------------------------------------------------------------------------------------|
| <i>ACVR1 (ALK2)</i> | AVSD in mouse model, <sup>1</sup> genetic association with AVSD in humans. <sup>2;3</sup>         | Loss of ACVR1 prevents EMT in the AV endocardial cushions <sup>1</sup>                                                                                                                                                  |
| <i>BMP2</i>         | AVSD in mouse model. <sup>4</sup> Required for SHF proliferation. <sup>5;6</sup>                  | Modulates SHH-induced proliferation of the SHF. <sup>5;7</sup> Control of AV cushion morphogenesis by regulating TBX2 and TBX3. <sup>8</sup>                                                                            |
| <i>BMP4</i>         | AVSD in mouse model. <sup>9</sup> Required for SHF proliferation. <sup>10</sup>                   | Loss of BMP4 prevents EMT in the AV endocardial cushions. <sup>9</sup> BMP4 signaling is critical to SHF specification upstream of Isl1. <sup>11</sup> BMP4 interacts with BMP2 in AV valve formation. <sup>12;13</sup> |
| <i>BMP5</i>         | Required for AV cushion formation. <sup>14</sup>                                                  | Expressed in the dorsal mesenchyme. <sup>15</sup>                                                                                                                                                                       |
| <i>CITED2</i>       | Reduced cell density in AV cushions. <sup>16</sup>                                                | Transcriptional coactivator required for initiation of Nodal, controlling left-right patterning. <sup>17</sup>                                                                                                          |
| <i>COL18A1</i>      | Expressed in AV cushions. <sup>18</sup>                                                           | Facilitates EMT and mesenchymal cell migration in the AV endocardial cushions. <sup>18</sup>                                                                                                                            |
| <i>COL6A1</i>       | Expressed in AV cushions. <sup>19;20</sup> gene association studies <sup>21-24</sup>              | Type VI collagen is a major component of the matrix in endocardial cushions. <sup>19;20</sup>                                                                                                                           |
| <i>COL6A2</i>       | Expressed in AV cushions. (Kitten, 1996; Klewer, 1998); Gene association studies <sup>21-24</sup> | Type VI collagen is a major component of the matrix in endocardial cushions. <sup>19;20</sup>                                                                                                                           |
| <i>COL6A3</i>       | Expressed in AV cushions. <sup>19;20</sup> Gene association studies. <sup>21-24</sup>             | Type VI collagen is a major component of the matrix in                                                                                                                                                                  |

|                    |                                                                                                                                                     |                                                                                                                                                                                             |
|--------------------|-----------------------------------------------------------------------------------------------------------------------------------------------------|---------------------------------------------------------------------------------------------------------------------------------------------------------------------------------------------|
| <i>CRELD1</i>      | Mutations in sporadic AVSD, <sup>25</sup> and previous study of AVSD in DS. <sup>26</sup>                                                           | Modulates VEGF-A signaling during AV cushion morphogenesis(C.L.M., unpublished data)                                                                                                        |
| <i>CRELD2</i>      | Association with <i>CRELD1</i> <sup>27</sup>                                                                                                        | Possible antagonistic of <i>CRELD1</i> <sup>27</sup>                                                                                                                                        |
| <i>CTGF (CCN2)</i> | Expressed in AV cushions. <sup>28</sup>                                                                                                             | Functional redundancy with <i>CYR61</i> . <sup>28</sup>                                                                                                                                     |
| <i>CYR61(CCN1)</i> | Haploinsufficiency of <i>CYR61</i> results in AVSD in mouse model. <i>CYR61</i> maps to the human <i>AVSD1</i> locus on chromosome 1. <sup>28</sup> | Haploinsufficiency of <i>CCN1</i> results in apoptosis in the AV junction at the stage of fusion between the endocardial cushion tissue and the atrial and ventricular septa. <sup>28</sup> |
| <i>FBLN2</i>       | Maps to the <i>AVSD2</i> locus on human chromosome 3. <sup>29</sup>                                                                                 | Marker of EMT in AV cushions. <sup>30</sup>                                                                                                                                                 |
| <i>FGF2</i>        | Involved in AV cushion remodeling. <sup>31</sup>                                                                                                    | FGF2 stimulates growth and inhibits apoptosis in endocardial cushions. <sup>31</sup>                                                                                                        |
| <i>FRZB</i>        | Marker of EMT in AV cushions. <sup>32</sup>                                                                                                         | FRZB is a modulator of Wnt-9A-mediated $\beta$ -catenin signaling during AV endocardial cushion development. <sup>33</sup>                                                                  |
| <i>GATA4</i>       | Mutations in familial AVSD. <sup>34</sup>                                                                                                           | Gata4 and Tbx5 interact during heart development, with complete AVSD in 100% of double heterozygous mice. <sup>35</sup>                                                                     |
| <i>GATA5</i>       | Expressed in AV cushions. <sup>36</sup>                                                                                                             | GATA5 is a transcriptional regulator of AV valve morphogenesis. <sup>36</sup>                                                                                                               |
| <i>HEY2</i>        | Septal defects in mouse model. <sup>37</sup>                                                                                                        | HEY2 controls developmental patterning of the AV canal by regulating BMP2. <sup>38</sup>                                                                                                    |
| <i>ROCK1</i>       | Needed for mesenchymal cell migration into AV cushions. <sup>39</sup>                                                                               | Activates CTGF and TGF $\beta$ 2, facilitating mesenchymal cell migration. <sup>40</sup>                                                                                                    |
| <i>SH3BGR</i>      | Expressed in AV cushions. <sup>41</sup> Association mapping in human AVSD. <sup>42</sup>                                                            | Unknown                                                                                                                                                                                     |
| <i>SHH</i>         | Required for SHF, <sup>43;44</sup> and development of DMP <sup>45</sup>                                                                             | SHH signaling is required to specify atrial septal progenitor fate. <sup>45</sup>                                                                                                           |
| <i>TBX1</i>        | Required for proper alignment of AV canal, <sup>46</sup> and SHF proliferation. <sup>47</sup>                                                       | Regulates proliferation and differentiation of heart progenitors through the GATA4>MEF2c pathway. <sup>48</sup>                                                                             |
| <i>TBX20</i>       | Regulates AV endocardial cushion development. <sup>5;49</sup>                                                                                       | Stage-specific effects on cardiomyocyte proliferation. <sup>50</sup>                                                                                                                        |
| <i>VTN</i>         | Cardiac valve and septa development. <sup>51</sup>                                                                                                  | Cell adhesion molecule. Binds <i>CYR61</i> , anchoring it to the ECM. <sup>52</sup>                                                                                                         |
| <i>WNT9A</i>       | Expressed in AV cushions <sup>33</sup>                                                                                                              | Interacts with <i>FRZB</i> <sup>33</sup>                                                                                                                                                    |

---

EMT, epithelial to mesenchymal transformation; SHF, secondary heart field; SHH, sonic hedgehog; ECM, extracellular matrix

---

**Table S2. Comparison of Minor Allele Frequencies of 5' UTR Variants in Cases and Controls**

| Gene          | cDNA Position | Number of Cases | Number of Controls | <i>p</i> value |
|---------------|---------------|-----------------|--------------------|----------------|
| <i>AVCR1</i>  | c.-53C>T      | 6               | 3                  | 0.50           |
| <i>CITED2</i> | c. -91G>A     | 4               | 2                  | 0.68           |
| <i>CITED2</i> | c. -52G>C     | 6               | 5                  | 1.00           |
| <i>COL6A1</i> | c. -3C>G      | 55              | 61                 | 0.55           |
| <i>CTGF</i>   | c. -92C>G     | 6               | 7                  | 1.00           |
| <i>FBLN2</i>  | c. -6T>C      | 41              | 28                 | 0.10           |
| <i>FGF2</i>   | c. -71G>AC    | 1               | 3                  | 0.62           |
| <i>FRZB</i>   | c. -117G>A    | 18              | 21                 | 0.73           |
| <i>ROCK1</i>  | c. -895C>T    | 16              | 15                 | 1.00           |
| <i>ROCK1</i>  | c. -428C>TG   | 2               | 2                  | 1.00           |
| <i>ROCK1</i>  | c. -427C>T    | 1               | 3                  | 0.62           |
| <i>ROCK1</i>  | c. -365C>G    | 1               | 1                  | 1.00           |
| <i>ROCK1</i>  | c. -40G>A     | 2               | 1                  | 1.00           |
| <i>SHH</i>    | c. -116G>A    | 13              | 12                 | 1.00           |
| <i>TBX1</i>   | c. -85C>G     | 66              | 62                 | 0.72           |

**Table S3. Case-Specific Variants with Actionable Hypotheses—Whites Only**

| Gene                       | Variant      | Frequency <sup>a</sup> | General Score<br>(Confidence Level) <sup>c</sup> | Structure/Function Hypotheses (Probability scores)                                                                                                                           |
|----------------------------|--------------|------------------------|--------------------------------------------------|------------------------------------------------------------------------------------------------------------------------------------------------------------------------------|
| <i>COL6A1</i> <sup>c</sup> | p.Val117Ala  | 2/141                  | 0.776 (VC)                                       | Loss of helix ( $p=0.0076$ ), gain of loop ( $p=0.0079$ ), loss of stability ( $p=0.0292$ ), gain of disorder ( $p=0.0353$ ), gain of ubiquitination at K121 ( $p=0.04441$ ) |
|                            | p.Gln768His  | 1/141                  | 0.537 (A)                                        | Gain of sheet ( $p=0.0016$ ), loss of helix ( $p=0.0017$ ), gain of loop ( $p=0.024$ )                                                                                       |
| <i>COL6A2</i> <sup>c</sup> | p.Arg853Gln  | 1/141                  | 0.869 (C)                                        | Gain of ubiquitination at K851 ( $p=0.0354$ )                                                                                                                                |
|                            | p.Glu106Lys  | 5/141                  | 0.759 (C)                                        | Gain of methylation at E106 ( $p=0.0122$ )                                                                                                                                   |
| <i>CRELD1</i>              | p.Arg329Cys  | 2/135                  | 0.860 (NP; validated)                            | NP; Biochemical analysis shows misfolding                                                                                                                                    |
|                            | p.Glu414Lys  | 1/135                  | 0.798 (VC)                                       | Gain of methylation ( $p=0.016$ ), Gain of MoRF binding ( $p=4e-04$ )                                                                                                        |
| <i>FBLN2</i>               | p.Ile1039Thr | 1/141                  | 0.696 (A)                                        | Loss of stability ( $p=0.0211$ )                                                                                                                                             |
| <i>FRZB</i>                | p.Phe100Ser  | 1/141                  | 0.543 (A)                                        | Gain of disorder ( $p=0.0078$ )                                                                                                                                              |
| <i>GATA5</i>               | p.Gln3Arg    | 2/141                  | 0.712 (C; validated)                             | Gain of MoRF <sup>d</sup> binding ( $p=8e-04$ ), gain of methylation ( $p=0.0283$ ). Transcription assay shows gain of function.                                             |
|                            | p.Tyr142His  | 1/141                  | 0.743 (A)                                        | Gain of disorder ( $p=0.0409$ )                                                                                                                                              |

<sup>a</sup> Frequency is the number of individuals in which each variant was identified over the number of total cases resequenced for that gene.

<sup>b</sup> Confidence level: A, actionable hypotheses; C, confident hypotheses; VC, very confident hypotheses; NP, none predicted.

<sup>c</sup> gene is located on chromosome 21 (trisomic for this population)

<sup>d</sup> Gain of MoRF binding is gain of molecular recognition factor binding (interaction with other molecules enhanced).

---

**Table S4. Control-Specific Variants with Actionable Hypotheses—Whites Only**

---

| Gene                        | Protein Variant | Frequency <sup>a</sup> | General Score<br>(Confidence Level) <sup>b</sup> | Structure/Function Hypotheses (Probability scores) |
|-----------------------------|-----------------|------------------------|--------------------------------------------------|----------------------------------------------------|
| <i>COL6A3</i>               | p.Tyr727Ser     | 1/141                  | 0.769 (C)                                        | Gain of disorder ( $p=0.0248$ )                    |
|                             | p.Ala932Ser     | 1/141                  | 0.515 (A)                                        | Gain of disorder ( $p=0.0218$ )                    |
| <i>COL18A1</i> <sup>c</sup> | p.Pro1213Trp    | 1/141                  | 0.610 (A)                                        | Loss of methylation at R1213 ( $p=0.007$ )         |

---

<sup>a</sup> Frequency is the number of individuals in which each variant was identified over the number of total cases resequenced for that gene.

<sup>b</sup> Confidence level: A, actionable hypotheses; C, confident hypotheses; VC, very confident hypotheses; NP, none predicted.

<sup>c</sup> gene is located on chromosome 21 (trisomic for this population).

---

## Supplemental References

1. Wang, J., Sridurongrit, S., Dudas, M., Thomas, P., Nagy, A., Schneider, M.D., Epstein, J.A., and Kaartinen, V. (2005). Atrioventricular cushion transformation is mediated by ALK2 in the developing mouse heart. *Dev. Biol.* 286, 299-310.
2. Joziase, I.C., Smith, K.A., Chocron, S., van Dinther, M., Guryev, V., van de Smagt, J.J., Cuppen, E., Ten Dijke, P., Mulder, B.J., Maslen, C.L., et al. (2011). ALK2 mutation in a patient with Down's syndrome and a congenital heart defect. *Eur. J. Hum. Genet.* 19, 389-393.
3. Smith, K.A., Joziase, I.C., Chocron, S., van Dinther, M., Guryev, V., Verhoeven, M.C., Rehmann, H., van der Smagt, J.J., Doevendans, P.A., Cuppen, E., et al. (2009). Dominant-negative ALK2 allele associates with congenital heart defects. *Circulation* 119, 3062-3069.
4. Ma, L., Lu, M.F., Schwartz, R.J., and Martin, J.F. (2005). Bmp2 is essential for cardiac cushion epithelial-mesenchymal transition and myocardial patterning. *Development* 132, 5601-5611.
5. Cai, X., Nomura-Kitabayashi, A., Cai, W., Yan, J., Christoffels, V.M., and Cai, C.L. (2011). Myocardial Tbx20 regulates early atrioventricular canal formation and endocardial epithelial-mesenchymal transition via Bmp2. *Dev. Biol.* 360, 381-390.
6. Prall, O.W., Menon, M.K., Solloway, M.J., Watanabe, Y., Zaffran, S., Bajolle, F., Biben, C., McBride, J.J., Robertson, B.R., Chaulet, H., et al. (2007). An Nkx2-5/Bmp2/Smad1 negative feedback loop controls heart progenitor specification and proliferation. *Cell* 128, 947-959.

7. Dyer, L.A., Makadia, F.A., Scott, A., Pegram, K., Hutson, M.R., and Kirby, M.L. (2010). BMP signaling modulates hedgehog-induced secondary heart field proliferation. *Dev. Biol.* *348*, 167-176.
8. Singh, R., Hoogaars, W.M., Barnett, P., Grieskamp, T., Rana, M.S., Buermans, H., Farin, H.F., Petry, M., Heallen, T., Martin, J.F., et al. (2012). Tbx2 and Tbx3 induce atrioventricular myocardial development and endocardial cushion formation. *Cell. Mol. Life Sci.* *69*, 1377-1389.
9. Jiao, K., Kulesa, H., Tompkins, K., Zhou, Y., Batts, L., Baldwin, H.S., and Hogan, B.L. (2003). An essential role of Bmp4 in the atrioventricular septation of the mouse heart. *Genes Dev.* *17*, 2362-2367.
10. Klaus, A., Saga, Y., Taketo, M.M., Tzahor, E., and Birchmeier, W. (2007). Distinct roles of Wnt/beta-catenin and Bmp signaling during early cardiogenesis. *Proc. Natl. Acad. Sci. U S A* *104*, 18531-18536.
11. Tirosh-Finkel, L., Elhanany, H., Rinon, A., and Tzahor, E. (2006). Mesoderm progenitor cells of common origin contribute to the head musculature and the cardiac outflow tract. *Development* *133*, 1943-1953.
12. Goldman, D.C., Donley, N., and Christian, J.L. (2009). Genetic interaction between Bmp2 and Bmp4 reveals shared functions during multiple aspects of mouse organogenesis. *Mech. Dev.* *126*, 117-127.
13. Uchimura, T., Komatsu, Y., Tanaka, M., McCann, K.L., and Mishina, Y. (2009). Bmp2 and Bmp4 genetically interact to support multiple aspects of mouse development including functional heart development. *Genesis* *47*, 374-384.

14. Yamagishi, T., Nakajima, Y., Nishimatsu, S., Nohno, T., Ando, K., and Nakamura, H. (2001). Expression of bone morphogenetic protein-5 gene during chick heart development: possible roles in valvuloseptal endocardial cushion formation. *Anat. Rec.* 264, 313-316.
15. Somi, S., Buffing, A.A., Moorman, A.F., and Van Den Hoff, M.J. (2004). Dynamic patterns of expression of BMP isoforms 2, 4, 5, 6, and 7 during chicken heart development. *Anat. Rec. A. Discov. Mol. Cell. Evol. Biol.* 279, 636-651.
16. Weninger, W.J., Lopes Floro, K., Bennett, M.B., Withington, S.L., Preis, J.I., Barbera, J.P., Mohun, T.J., and Dunwoodie, S.L. (2005). *Cited2* is required both for heart morphogenesis and establishment of the left-right axis in mouse development. *Development* 132, 1337-1348.
17. Bamforth, S.D., Braganca, J., Farthing, C.R., Schneider, J.E., Broadbent, C., Michell, A.C., Clarke, K., Neubauer, S., Norris, D., Brown, N.A., et al. (2004). *Cited2* controls left-right patterning and heart development through a Nodal-Pitx2c pathway. *Nat. Genet.* 36, 1189-1196.
18. Carvalhaes, L.S., Gervasio, O.L., Guatimosim, C., Heljasvaara, R., Sormunen, R., Pihlajaniemi, T., and Kitten, G.T. (2006). Collagen XVIII/endostatin is associated with the epithelial-mesenchymal transformation in the atrioventricular valves during cardiac development. *Dev. Dyn.* 235, 132-142.
19. Kitten, G.T., Kolker, S.J., Krob, S.L., and Klewer, S.E. (1996). Type VI collagen in the cardiac valves and connective tissue septa during heart development. *Braz. J. Med. Biol. Res* 29, 1189-1193.
20. Klewer, S.E., Krob, S.L., Kolker, S.J., and Kitten, G.T. (1998). Expression of type VI collagen in the developing mouse heart. *Dev. Dyn.* 211, 248-255.



21. Baptista, M.J., Fairbrother, U.L., Howard, C.M., Farrer, M.J., Davies, G.E., Trikka, D., Maratou, K., Redington, A., Greve, G., Njolstad, P.R., et al. (2000). Heterotrismy, a significant contributing factor to ventricular septal defect associated with Down syndrome? *Hum. Genet.* *107*, 476-482.
22. Davies, G.E., Howard, C.M., Farrer, M.J., Coleman, M.M., Bennett, L.B., Cullen, L.M., Wyse, R.K., Burn, J., Williamson, R., and Kessling, A.M. (1995). Genetic variation in the COL6A1 region is associated with congenital heart defects in trisomy 21 (Down's syndrome). *Ann. Hum. Genet.* *59*, 253-269.
23. Davies, G.E., Howard, C.M., Farrer, M.J., Coleman, M.M., Cullen, L.M., Williamson, R., Wyse, R.K., and Kessling, A.M. (1994). Unusual genotypes in the COL6A1 gene in parents of children with trisomy 21 and major congenital heart defects. *Hum. Genet.* *93*, 443-446.
24. Davies, G.E., Howard, C.M., Gorman, L.M., Farrer, M.J., Holland, A.J., Williamson, R., and Kessling, A.M. (1993). Polymorphisms and linkage disequilibrium in the COL6A1 and COL6A2 gene cluster: novel DNA polymorphisms in the region of a candidate gene for congenital heart defects in Down's syndrome. *Hum. Genet.* *90*, 521-525.
25. Robinson, S.W., Morris, C.D., Goldmuntz, E., Reller, M.D., Jones, M.A., Steiner, R.D., and Maslen, C.L. (2003). Missense mutations in CRELD1 are associated with cardiac atrioventricular septal defects. *Am. J. Hum. Genet.* *72*, 1047-1052.

26. Maslen, C.L., Babcock, D., Robinson, S.W., Bean, L.J., Dooley, K.J., Willour, V.L., and Sherman, S.L. (2006). CRELD1 mutations contribute to the occurrence of cardiac atrioventricular septal defects in Down syndrome. *Am. J. Med. Genet. A.* *140*, 2501-2505.
27. Rupp, P.A., Fouad, G.T., Egelston, C.A., Reifsteck, C.A., Olson, S.B., Knosp, W.M., Glanville, R.W., Thornburg, K.L., Robinson, S.W., and Maslen, C.L. (2002). Identification, genomic organization and mRNA expression of CRELD1, the founding member of a unique family of matricellular proteins. *Gene* *293*, 47-57.
28. Mo, F.E., and Lau, L.F. (2006). The matricellular protein CCN1 is essential for cardiac development. *Circ. Res.* *99*, 961-969.
29. Green, E.K., Priestley, M.D., Waters, J., Maliszewska, C., Latif, F., and Maher, E.R. (2000). Detailed mapping of a congenital heart disease gene in chromosome 3p25. *J. Med. Genet.* *37*, 581-587.
30. Tsuda, T., Wang, H., Timpl, R., and Chu, M.L. (2001). Fibulin-2 expression marks transformed mesenchymal cells in developing cardiac valves, aortic arch vessels, and coronary vessels. *Dev. Dyn* *222*, 89-100.
31. Zhao, Z., and Rivkees, S.A. (2000). Programmed cell death in the developing heart: regulation by BMP4 and FGF2. *Dev. Dyn.* *217*, 388-400.
32. Lee, Y.H., and Saint-Jeannet, J.P. (2009). Characterization of molecular markers to assess cardiac cushions formation in *Xenopus*. *Dev. Dyn.* *238*, 3257-3265.

33. Person, A.D., Garriock, R.J., Krieg, P.A., Runyan, R.B., and Klewer, S.E. (2005). Frzb modulates Wnt-9a-mediated beta-catenin signaling during avian atrioventricular cardiac cushion development. *Dev. Biol.* 278, 35-48.
34. Garg, V., Kathiriya, I.S., Barnes, R., Schluterman, M.K., King, I.N., Butler, C.A., Rothrock, C.R., Eapen, R.S., Hirayama-Yamada, K., Joo, K., et al. (2003). GATA4 mutations cause human congenital heart defects and reveal an interaction with TBX5. *Nature* 424, 443-447.
35. Maitra, M., Schluterman, M.K., Nichols, H.A., Richardson, J.A., Lo, C.W., Srivastava, D., and Garg, V. (2009). Interaction of Gata4 and Gata6 with Tbx5 is critical for normal cardiac development. *Dev. Biol.* 326, 368-377.
36. Reiter, J.F., Alexander, J., Rodaway, A., Yelon, D., Patient, R., Holder, N., and Stainier, D.Y. (1999). Gata5 is required for the development of the heart and endoderm in zebrafish. *Genes. Dev.* 13, 2983-2995.
37. Sakata, Y., Kamei, C.N., Nakagami, H., Bronson, R., Liao, J.K., and Chin, M.T. (2002). Ventricular septal defect and cardiomyopathy in mice lacking the transcription factor CHF1/Hey2. *Proc. Natl. Acad. Sci. U S A.* 99, 16197-16202.
38. Rutenberg, J.B., Fischer, A., Jia, H., Gessler, M., Zhong, T.P., and Mercola, M. (2006). Developmental patterning of the cardiac atrioventricular canal by Notch and Hairy-related transcription factors. *Development* 133, 4381-4390.

39. Sakabe, M., Ikeda, K., Nakatani, K., Kawada, N., Imanaka-Yoshida, K., Yoshida, T., Yamagishi, T., and Nakajima, Y. (2006). Rho kinases regulate endothelial invasion and migration during valvuloseptal endocardial cushion tissue formation. *Dev. Dyn.* 235, 94-104.
40. Shi, J., Zhang, L., and Wei, L. (2011). Rho-kinase in development and heart failure: insights from genetic models. *Pediatr. Cardiol.* 32, 297-304.
41. Egeo, A., Di Lisi, R., Sandri, C., Mazzocco, M., Lapide, M., Schiaffino, S., and Scartezzini, P. (2000). Developmental expression of the SH3BGR gene, mapping to the Down syndrome heart critical region. *Mech. Dev.* 90, 313-316.
42. Kerstann, K.F., Feingold, E., Freeman, S.B., Bean, L.J., Pyatt, R., Tinker, S., Jewel, A.H., Capone, G., and Sherman, S.L. (2004). Linkage disequilibrium mapping in trisomic populations: analytical approaches and an application to congenital heart defects in Down syndrome. *Genet. Epidemiol.* 27, 240-251.
43. Goddeeris, M.M., Rho, S., Petiet, A., Davenport, C.L., Johnson, G.A., Meyers, E.N., and Klingensmith, J. (2008). Intracardiac septation requires hedgehog-dependent cellular contributions from outside the heart. *Development* 135, 1887-1895.
44. Goddeeris, M.M., Schwartz, R., Klingensmith, J., and Meyers, E.N. (2007). Independent requirements for Hedgehog signaling by both the anterior heart field and neural crest cells for outflow tract development. *Development* 134, 1593-1604.
45. Hoffmann, A.D., Peterson, M.A., Friedland-Little, J.M., Anderson, S.A., and Moskowitz, I.P. (2009). Sonic hedgehog is required in pulmonary endoderm for atrial septation. *Development* 136, 1761-1770.

46. Kokubo, H., Miyagawa-Tomita, S., Tomimatsu, H., Nakashima, Y., Nakazawa, M., Saga, Y., and Johnson, R.L. (2004). Targeted disruption of *hesr2* results in atrioventricular valve anomalies that lead to heart dysfunction. *Circ. Res.* *95*, 540-547.
47. Chen, L., Fulcoli, F.G., Tang, S., and Baldini, A. (2009). *Tbx1* regulates proliferation and differentiation of multipotent heart progenitors. *Circ. Res* *105*, 842-851.
48. Pane, L.S., Zhang, Z., Ferrentino, R., Huynh, T., Cutillo, L., and Baldini, A. (2012). *Tbx1* is a negative modulator of *Mef2c*. *Hum. Mol. Genet.*
49. Shelton, E.L., and Yutzey, K.E. (2007). *Tbx20* regulation of endocardial cushion cell proliferation and extracellular matrix gene expression. *Dev. Biol.* *302*, 376-388.
50. Chakraborty, S., and Yutzey, K.E. (2012). *Tbx20* regulation of cardiac cell proliferation and lineage specialization during embryonic and fetal development in vivo. *Dev. Biol.* *363*, 234-246.
51. Bouchev, D., Argraves, W.S., and Little, C.D. (1996). Fibulin-1, vitronectin, and fibronectin expression during avian cardiac valve and septa development. *Anat. Rec.* *244*, 540-551.
52. Francischetti, I.M., Kotsyfakis, M., Andersen, J.F., and Lukszo, J. (2010). *Cyr61/CCN1* displays high-affinity binding to the somatomedin B(1-44) domain of vitronectin. *P.L.o.S. One.* *5*, e9356.
